# Supplementary material
Source: PubMed Central journal article supplement (PMC7421468)
Supplement: NIHMS1610774-supplement-Supplement1.pdf [file NIHMS1610774-supplement-Supplement1.pdf]

## Supplementary Appendix

This appendix has been provided by the authors to give readers additional information about their work.

Supplement to: Bhasin S, Gill TM, Reuben DB, et al. A randomized trial of a multifactorial strategy to prevent serious fall injuries. *N Engl J Med* 2020;383:129-40. DOI: [10.1056/NEJMoa2002183](https://doi.org/10.1056/NEJMoa2002183)

## **SUPPLEMENTARY APPENDIX**

**Manuscript: 20-02183.R2\_Bhasin\_STRIDE**

### **A Randomized Trial of a Multifactorial Strategy to Prevent Serious Fall Injuries**

Shalender Bhasin, MB, BS; Thomas M. Gill, MD; David B. Reuben, MD; Nancy K. Latham, PT, PhD; David A. Ganz, MD, PhD; Erich J. Greene, PhD; James Dziura, PhD; Shehzad Basaria, MD; Jerry H. Gurwitz, MD; Patricia C. Dykes, RN, PhD, MA; Siobhan McMahon, PhD, MPH; Thomas W. Storer, PhD; Priscilla Gazarian, RN, PhD; Michael E. Miller, PhD; Thomas G. Trivison, PhD; Denise Esserman, PhD; Martha B. Carnie, AS; Lori Goehring BA; Maureen Fagan, DNP FNP-BC,FAAN; Susan L. Greenspan, MD; Neil Alexander, MD; Jocelyn Wiggins, BM BCh; Fred Ko, MD, MS; Albert L. Siu, MD, MSPH; Elena Volpi, MD, PhD; Albert W. Wu, MD, MPH; Jeremy Rich, DPM; Stephen C. Waring, DVM, PhD; Robert B. Wallace, MD, MSc; Carri Casteel, PhD, MPH; Neil M. Resnick MD; Jay Magaziner, MSHyg, PhD; Peter Charpentier, MPH; Charles Lu, MS; Katy Araujo, MPH; Haseena Rajeevan, PhD; Can Meng MS MPH; Healthier Allore PhD; Brooke F. Brawley, MPA; Rich Eder, BA; Joanne M. McGloin MDiv, MS, MBA; Eleni A. Skokos, BS MS; Pamela W. Duncan, PhD, PT; Dorothy Baker PhD; Chad Boulton MD MPH MBA; Rosaly Correa-de-Araujo, MD, MS, PhD; Peter Peduzzi, PhD

# A Randomized Trial of a Multifactorial Strategy to Prevent Serious Fall Injuries

## Table of Contents

|                        |       |
|------------------------|-------|
| Investigator List..... | 3-6   |
| Figure S1.....         | 7     |
| Figure S2.....         | 8     |
| Table S1.....          | 9-10  |
| Table S2.....          | 11    |
| Table S3.....          | 12-13 |

## **The STRIDE Study Team**

### ***Joint Principal Investigators:***

Shalender Bhasin MB, BS, Communicating PI and Chair of the Steering and Publications Committees, and Central Project Management (Brigham and Women's Hospital, Harvard Medical School, Boston, MA)

Thomas M. Gill MD, PI and Chair of Protocol and Screening, Recruitment and Retention Committees (Yale School of Medicine, New Haven, CT)

David B. Reuben MD, PI and Chair of Intervention Committee (David Geffen School of Medicine at UCLA, Los Angeles, CA)

### ***Central Project Management, Brigham and Women's Hospital, Boston, MA:***

Shalender Bhasin MB BS (PI), Nancy K. Latham PT PhD (Study Director), Shehzad Basaria MD (Chief Medical Safety Officer), Thomas W. Storer PhD, Brooke F. Brawley MPA (cIRB Liaison), Richard Eder BA, Amy Larson MHA (Administrative Director), Lori Goehring BA (Study Manager), Molly Lukas BS, Scott Margolis MBA, Martha B. Carnie AS, Priscilla Gazarian PhD RN [University of Massachusetts Boston, Boston, MA], Maureen Fagan DNP, FNP-BC, FAAN [University of Miami Health System, Miami, FL], Lisa M. Quintiliani PhD [Boston University School of Medicine, Boston, MA]

### ***Data Coordinating Center, Yale University, New Haven, CT:***

DCC Principal Investigator: Peter Peduzzi PhD

James Dziura PhD, Denise Esserman PhD, Erich J. Greene PhD, Can Meng MS MPH, Heather Allore PhD, Charles Lu MS, Haseena Rajeevan PhD, Liliya Katsovich MA MBA CCRP, Rixin Wang PhD, Brian Funaro, Nancy Lorenze DNSc, Margaret Doyle MPH, Bridget Mignosa, Geraldine Hawthorne-Jones BS, Sui Tsang BS, Michael E. Miller PhD (Wake Forest), Thomas G. Trivison PhD (Harvard), Peter Charpentier MPH (Chair of Data Management Committee), Katy Araujo MPH (Co-Chair of Data Management Committee)

### ***Yale School of Medicine, New Haven, CT:***

#### ***Geriatric Medicine:***

Dorothy Baker PhD

#### ***Recruitment and Assessment Center:***

Joanne M. McGloin MDiv, MS, MBA, Amy Shelton MPH, Eleni A. Skokos BS MS, Mara Abella, Luann M. Bianco BA, Rina Castro, Sabina Rubeck MPH, Karen Wu, David Nock BS, Crysta Collins AS BS, Kenneth Rando LCSW, Eloisa Martinez BS CCRP (UTMB)

#### ***School of Nursing, University of Minnesota***

Siobhan McMahon PhD MPH GNP-BC (Nursing Director)

## ***Clinical Trial Sites***

### *Essentia Health, Duluth, MN Site*

Principal Investigator: Stephen C. Waring, DVM, PhD, Fall Care Managers: Erica Chopskie RN, MPH and Heather Larsen RN, BA, Allise Taran MPH, Joseph Bianco MD, FAAFP, Margaret Hoberg CNP, Hillary Henzler-Buckingham BS, Austin Land

### *HealthCare Partners, El Segundo, CA*

Site Principal Investigator: Jeremy Rich, DPM, Fall Care Manager: Vivian Chavez RN BSN, Christine Moore RN MA, Janelle Howe, Rosario Garcia, Samuel Ho MD, Yan Chen, MD

### *Johns Hopkins Medicine, Baltimore MD*

Site Principal Investigator: Albert W. Wu MD MPH, Jeremy D. Walston, MD, Yuri Agrawal MD, Patti Ephraim MPH; Fall Care Manager: Tiffany Campbell BSN, RN, BMTCN, OCN; Johns Hopkins Community Physicians: Steven J. Kravet, MD MBA, Michael Albert MD, Bimal Ashar MD MBA, Bernhard Birnbaum MD, Sajida Chaudry MD, LaToya Edwards MD, Scott Feeser MD, Naaz A. Hussain MD, Amrish Joseph MD, Alice Lee MD, and Tara Scheck MD.

### *MercyOne Population Health Services Organization (Des Moines, IA) and University of Iowa (Iowa City, IA)*

Site Principal Investigator: Robert B. Wallace MD, MSc, Co-Site Principal Investigator: Carri Casteel PhD, MPH; Fall Care Manager: Angela Shanahan BSN, RN-BC, Julie Weldon MSN RN, Anita Leveke BSN, RN CEN, Charles F. Keller MD, Jeffrey C. Reist BS, PharmD, BCPS; David Swieskowski MD

### *Michigan Medicine, University of Michigan, Ann Arbor, MI*

Site Principal Investigator: Neil Alexander MD, Jocelyn Wiggins BM BCh, Fall Care Managers: Karen Burek RN MS ANP-BC and Tina Ledesma RN BSN, Linda V. Nyquist PhD, Nancy (Amby) Gallagher APRN-BC, PhD, Catherine Hanson BA

### *Mount Sinai Health System, New York, NY*

Site Principal Investigator: Fred Ko MD MS, Albert L. Siu MD MSPH, Rosanne M. Leipzig MD PhD, Christian Espino BA, Ravishankar Ramaswamy MD MS, Fall Care Managers: Deborah West RN BS BA and Deborah Matza RN MPH C-IAYT

### *Partners Healthcare, Boston, MA*

Site Principal Investigator: Patricia C. Dykes, RN, PhD, MA, Hilary Stenvig BS, Kety FlorGomes BA, BSN, RN, Taylor Christiansen BS, Alejandra Salazar PharmD RPh, Laura Frain MD MPH, Ariela Orkaby MD MPH, Jonathan Bean MD MPH, Fall Care Managers: Yvette Wells RN, BSN and Cathy Foskett BS, RN

### *Reliant Medical Group, Worcester, MA*

Site Principal Investigator: Jerry H. Gurwitz MD; Falls Care Managers: Peggy Preusse RN and Anne McDonald RN; and Lawrence Garber MD, Allison Richards BA, Azraa Amroze BS, and Mary Ellen Stansky

*University of Pittsburgh Medical Center, Pittsburgh, PA*

Site Principal Investigator: Susan L. Greenspan, MD, Fall Care Manager: Mary Anne Ferchak RN BSN, Madeline Rigatti BS, Neil M. Resnick MD

*University of Texas Medical Branch at Galveston, Galveston, TX*

Site Principal Investigator: Elena Volpi MD PhD, Fall Care Manager: Summer R. Chapman MSN, RN, CCRP, Roxana Hirst MS CCRP, Eloisa Martinez BS CCRP, Mukaila Raji MD, MSc (Pharm), FACP, UTMB Clinical Practice Physicians: Megan A. Berman MD, Michael P. Binder MD, Cindy Chan MD, Matthew J. Hay, MD, Elizabeth A. Jaramillo MD MS, Michael T. Nguyen MD, Angela J. Shepherd MD, Lindsay K. Sonstein MD, UT Health Practicing Physicians: Julie S. Bortolotti MD, Amber M. Zulfiqar MD

***STRIDE Committee Chairs:***

***Steering:*** Shalender Bhasin MB, BS

***Protocol:*** Thomas M. Gill MD

***Clinical Trial Sites:*** Jerry H. Gurwitz MD

***Outcomes:*** Jay Magaziner PhD MSHyg (University of Maryland) and Albert L. Siu MD MSPH

***Adjudication:*** David A. Ganz, MD PhD (UCLA and VA Greater Los Angeles Healthcare System)

***Screening, Recruitment and Retention:*** Joanne M. McGloin M Div, MS, MBA and Thomas M. Gill, MD

***Biostatistics:*** Peter Peduzzi PhD

***Data Management and IT:*** Peter Charpentier MPH, Katy Araujo MPH

***Intervention:*** David B. Reuben MD

***Safety:*** Shehzad Basaria MD

***Falls Care Managers:*** Siobhan McMahon PhD MPH GNP-BC (University of Minnesota);

***National Patient and Stakeholder:*** Maureen Fagan DNP, FNP-BC, FAAN (Chair), Martha B. Carnie AS (Co-Chair), Catherine Hanson BA

***Physical Components:*** Pamela W. Duncan PhD, PT (Wake Forest University) and Thomas W. Storer PhD

***FCM Training:*** Chad Boulton MD MPH MBA (Johns Hopkins) and Priscilla Gazarian PhD RN

***Ancillary Studies:*** James S. Goodwin MD (UTMB) and Todd M. Manini PhD (University of Florida)

**Publications:** Shalender Bhasin MB, BS and Peter Peduzzi PhD

***Wake Forest University, Winston-Salem NC***

Kevin P. High MD MS, Lea N. Harvin BS, Cynthia L. Stowe MPM

***National Institute on Aging, Bethesda, Maryland:***

Program Officer: Sergei Romashkan MD, Scientific Officer: Rosaly Correa-de-Araujo MD MS PhD;  
Other Program Staff: Lyndon Joseph PhD, Marcel E. Salive MD MPH, Evan C. Hadley MD

***Patient Centered Outcomes Research Institute (PCORI), Washington, D.C.***

Steven B. Clauser PhD MPA

**The Data and Safety Monitoring Board**

A 9-member Data and Safety Monitoring Board, appointed by the National Institute on Aging, reviewed study's progress and safety data every 6 months, and included:

David M. Buchner MD MPH (Chair); Terry Fulmer PhD RN FAAN; Susan S. Ellenberg PhD; Bonita Lynn Beattie MPT MHA; Abby C. King PhD; Cynthia J. Brown MD MSPH FACP; Laurence Rubenstein MD MPH; MaryAnne Sterling CEA; Thomas R. Prohaska PhD; Lawrence Friedman MD

**Figure S1. CONSORT Diagram for the STRIDE Study Showing the Enrollment and Randomization of Primary Care Practices, and their Disposition Through the Course of the Study**

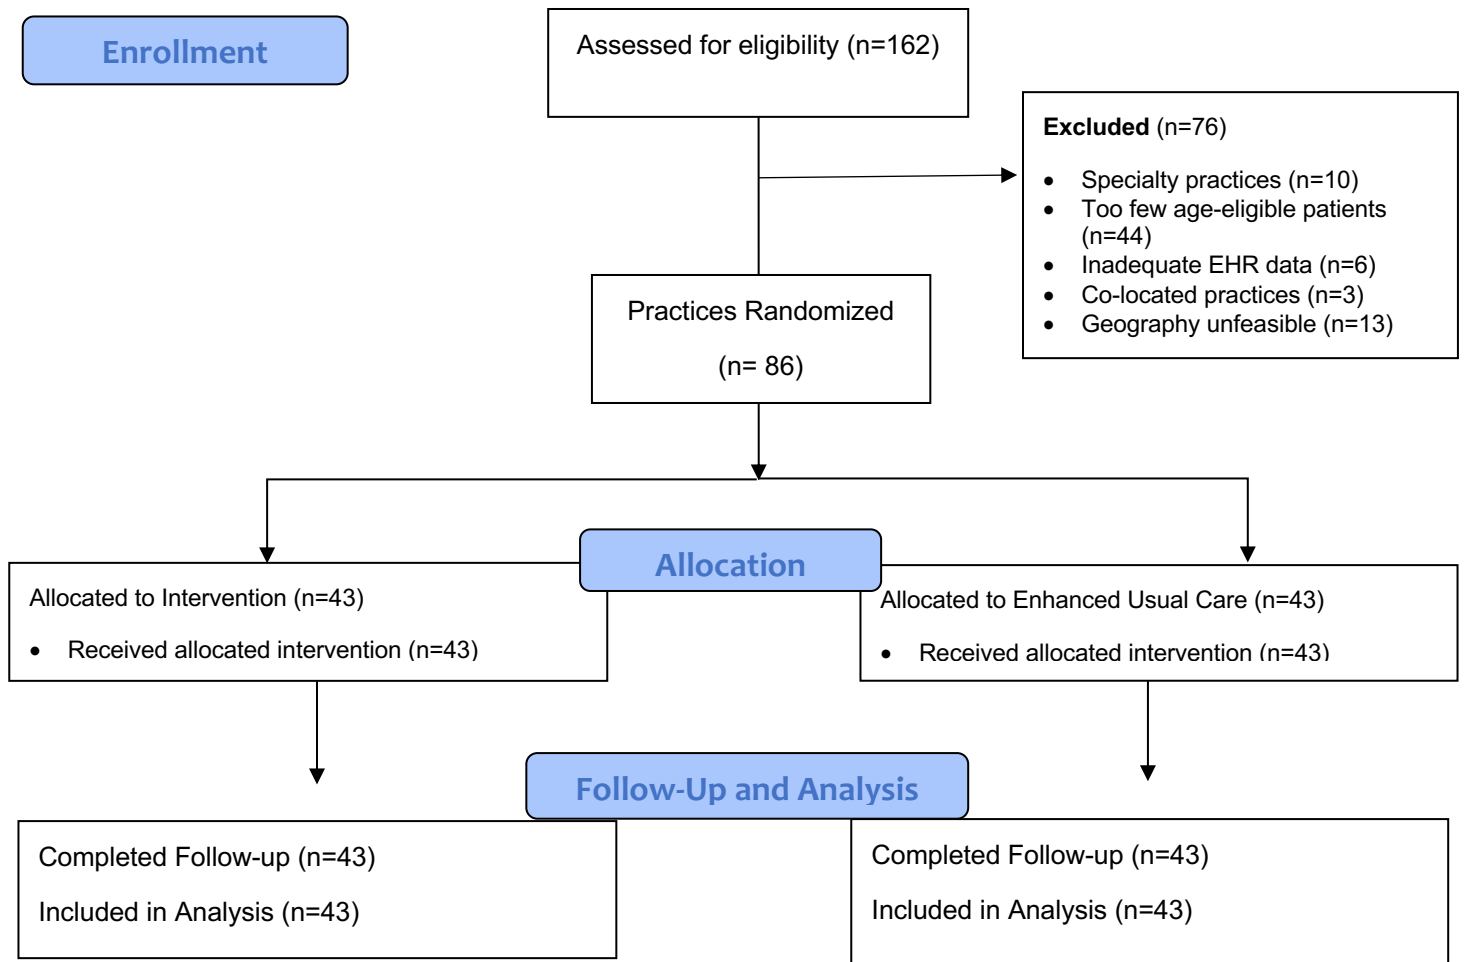

**Figure S1 Legend.** The enrollment of primary care clinical practices, allocation of practices to the intervention or enhanced usual care arms, and follow-up through the study are shown. All 86 practices completed study follow-up and were included in the analysis.



**Figure S2. CONSORT Diagram Showing Flow of Participants Through the Study.**

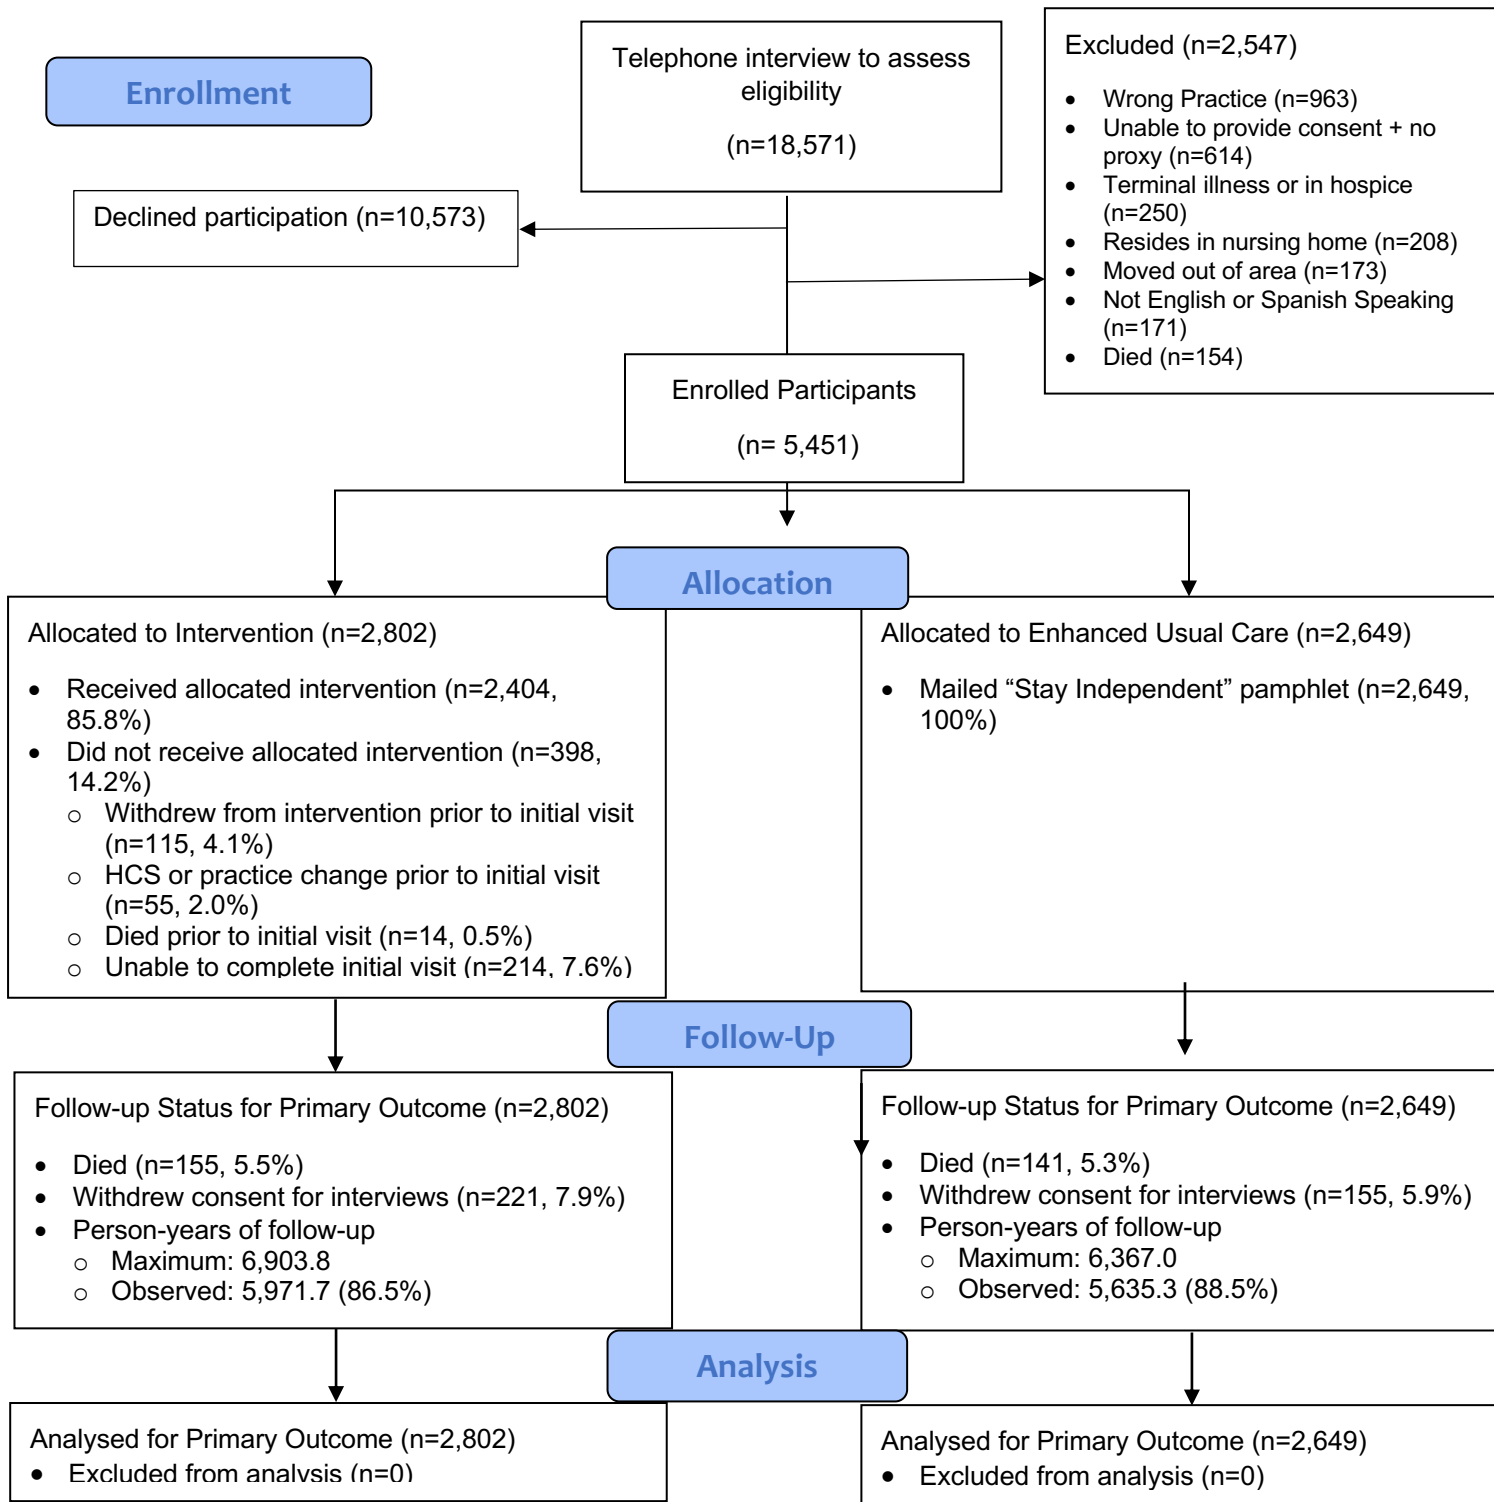

**Figure S2 Legend.** Of the 18,751 older adults assessed for eligibility in a telephone interview, 5,451 were deemed eligible and enrolled, 2,802 in practices randomized to the intervention arm and 2,649 to practices randomized to enhanced usual care. All enrolled participants were included in the analysis.

**Table S1. Characteristics of the Randomized Practices and the Practice-Level Baseline Characteristics of the Participants Enrolled in the Intervention and Enhanced Usual Care Practices \***

|                                                              | <i>Intervention practices<br/>(N = 43)</i> | <i>Enhanced usual care practices<br/>(N = 43)</i> |
|--------------------------------------------------------------|--------------------------------------------|---------------------------------------------------|
| <b>CHARACTERISTICS OF THE RANDOMIZED PRACTICES</b>           |                                            |                                                   |
| Urban, n                                                     | 39                                         | 39                                                |
| Majority white, n                                            | 35                                         | 35                                                |
| Majority English-speaking <sup>†</sup> , n                   | 40                                         | 40                                                |
| Practice size <sup>‡</sup>                                   |                                            |                                                   |
| First tertile (400-690) <sup>‡</sup> , n                     | 14                                         | 14                                                |
| Second tertile (694-965) <sup>‡</sup> , n                    | 14                                         | 15                                                |
| Third tertile (985-5946) <sup>‡</sup> , n                    | 15                                         | 14                                                |
| Median (IQR)                                                 | 772 (524)                                  | 802 (611)                                         |
| <b>BASELINE CHARACTERISTICS OF PARTICIPANTS<sup>††</sup></b> |                                            |                                                   |
| Age (years), mean                                            | 79.8 ± 1.2                                 | 79.3 ± 1.2                                        |
| Female sex, n (%)                                            | 64.2 ± 9.3                                 | 63.0 ± 10.9                                       |
| Race, %                                                      |                                            |                                                   |
| White                                                        | 89.1 ± 14.4                                | 89.2 ± 11.2                                       |
| Black                                                        | 6.1 ± 12.1                                 | 6.6 ± 9.5                                         |
| Other                                                        | 4.3 ± 6.0                                  | 3.4 ± 5.0                                         |
| Unknown                                                      | 0.4 ± 0.7                                  | 0.8 ± 1.1                                         |
| Latino/Hispanic ethnicity, n (%)                             | 9.7 ± 17.7                                 | 9.6 ± 17.9                                        |
| Education, %                                                 |                                            |                                                   |
| High school graduate or less                                 | 25.5 ± 14.2                                | 26.3 ± 16.0                                       |
| Some college or equivalent                                   | 26.2 ± 9.8                                 | 25.5 ± 9.2                                        |
| College graduate                                             | 18.7 ± 7.6                                 | 18.6 ± 6.1                                        |
| Post-graduate                                                | 29.6 ± 14.7                                | 29.5 ± 18.0                                       |
| Unknown                                                      | 0.0 ± 0.2                                  | 0.1 ± 0.4                                         |
| Chronic conditions <sup>§</sup> , mean                       | 2.1 ± 0.2                                  | 2.2 ± 0.2                                         |

|                                                          |            |            |
|----------------------------------------------------------|------------|------------|
| Hypertension, n (%)                                      | 63.6 ± 7.0 | 67.5 ± 8.3 |
| Fracture other than hip since age 50, n (%)              | 32.7 ± 7.6 | 33.1 ± 7.9 |
| Cancer, n (%)                                            | 24.7 ± 6.8 | 25.5 ± 8.1 |
| Arthritis, n (%)                                         | 21.7 ± 7.3 | 20.8 ± 6.0 |
| Diabetes, n (%)                                          | 21.7 ± 9.0 | 22.0 ± 9.5 |
| Chronic lung disease, n (%)                              | 15.5 ± 5.6 | 14.3 ± 5.1 |
| Myocardial infraction, n (%)                             | 9.9 ± 5.3  | 10.7 ± 4.6 |
| Stroke, n (%)                                            | 7.9 ± 4.2  | 7.5 ± 3.7  |
| Congestive heart failure, n (%)                          | 7.3 ± 4.4  | 7.2 ± 3.8  |
| Hip fracture, n (%)                                      | 4.1 ± 2.8  | 4.5 ± 3.2  |
| Parkinson's Disease, n (%)                               | 3.2 ± 3.3  | 2.0 ± 1.8  |
| Cognitively impaired <sup>¶</sup> , n (%)                | 2.8 ± 2.4  | 2.8 ± 2.4  |
| Use of mobility aid or nonambulatory, n (%)              | 34.6 ± 9.2 | 34.9 ± 9.1 |
| Screening questions for fall injuries, %                 |            |            |
| Fell 2 or more times in past year                        | 36.3 ± 8.7 | 34.8 ± 9.0 |
| Fell and hurt self in past year                          | 38.4 ± 5.2 | 39.4 ± 6.2 |
| Afraid of falling because of walking or balance problems | 86.1 ± 5.4 | 86.6 ± 6.9 |
| Fear of falling only                                     | 48.3 ± 7.5 | 47.9 ± 9.0 |
| Positive fall screening questions, %                     |            |            |
| 1                                                        | 58.6 ± 7.4 | 58.1 ± 8.9 |
| 2                                                        | 22.0 ± 5.4 | 23.0 ± 7.1 |
| 3                                                        | 19.4 ± 5.9 | 18.9 ± 6.0 |

Legend: \* Because the unit of randomization was the practice rather than the participant, this table is included as a check on the adequacy of the randomization.

† Not explicitly constrained, balance forced by constraining on rural/urban and majority white.

‡ The practice size refers to the number of age-eligible patients in the practice. The range of the number of age-eligible patients in each tertile is shown in the parentheses.

¶ Data for baseline characteristics are mean ± SD

§ Listed in order of overall prevalence from highest to lowest.

|| Four or more errors on 6-item Callahan cognitive screener or interview completed entirely by proxy.

**Table S2. All Serious Fall Injuries and Self-reported Fall Injuries by Study Arm**

| <i>Endpoint</i>           | <i>Intervention</i>  |                         | <i>Enhanced usual care</i> |                         | <i>HR* (CI<sup>†</sup>)</i> |
|---------------------------|----------------------|-------------------------|----------------------------|-------------------------|-----------------------------|
|                           | <i>No. of events</i> | <i>Rate per 100 PYF</i> | <i>No. of events</i>       | <i>Rate per 100 PYF</i> |                             |
| All serious fall injuries | 330                  | 5.2                     | 336                        | 5.6                     | 0.94 (0.81-1.10)            |
| All fall injuries         | 2268                 | 35.8                    | 2298                       | 38.0                    | 0.96 (0.89-1.03)            |

Legend: \* Hazard ratio (HR) from practice-level Poisson model adjusted for healthcare system and practice characteristics (size, geography, race/ethnicity)

† 95% Confidence Interval (CI) for all serious fall injuries, 99% CI for all fall injuries

PYF, person-years of follow-up

**Table S3. Types of Adjudicated Serious Fall Injuries by Study Arm**

| Injury type                            | Intervention<br>(N = 2,802) |                     | Enhanced usual care<br>(N = 2,649) |                     |
|----------------------------------------|-----------------------------|---------------------|------------------------------------|---------------------|
|                                        | Patients (%)*               | Events <sup>†</sup> | Patients (%)*                      | Events <sup>†</sup> |
| Any serious fall injury                | 291 (11.0)                  | 330                 | 301 (11.4)                         | 336                 |
| Fractures                              | 184 (6.9)                   | 211                 | 203 (7.7)                          | 230                 |
| Head or skull                          | 1 (0.0)                     | 1                   | 4 (0.2)                            | 4                   |
| Facial                                 | 10 (0.4)                    | 10                  | 10 (0.4)                           | 10                  |
| Hand or finger                         | 14 (0.5)                    | 14                  | 9 (0.3)                            | 9                   |
| Lower arm or wrist                     | 23 (0.9)                    | 25                  | 31 (1.2)                           | 31                  |
| Elbow                                  | 10 (0.4)                    | 10                  | 11 (0.4)                           | 11                  |
| Shoulder or upper arm                  | 19 (0.7)                    | 20                  | 22 (0.8)                           | 23                  |
| Neck                                   | 2 (0.1)                     | 2                   | 6 (0.2)                            | 6                   |
| Clavicle                               | 6 (0.2)                     | 6                   | 9 (0.3)                            | 9                   |
| Rib                                    | 25 (0.9)                    | 27                  | 33 (1.2)                           | 33                  |
| Pelvis                                 | 12 (0.5)                    | 12                  | 10 (0.4)                           | 10                  |
| Hip                                    | 38 (1.4)                    | 40                  | 42 (1.6)                           | 43                  |
| Tailbone                               | 0 (0.0)                     | 0                   | 1 (0.0)                            | 1                   |
| Upper or lower leg                     | 3 (0.1)                     | 3                   | 2 (0.1)                            | 2                   |
| Knee                                   | 8 (0.3)                     | 8                   | 9 (0.3)                            | 9                   |
| Ankle                                  | 13 (0.5)                    | 14                  | 11 (0.4)                           | 11                  |
| Foot or toe                            | 16 (0.6)                    | 16                  | 16 (0.6)                           | 16                  |
| Other                                  | 3 (0.1)                     | 3                   | 2 (0.1)                            | 2                   |
| Joint dislocation                      | 5 (0.2)                     | 5                   | 4 (0.2)                            | 4                   |
| Cut requiring closure                  | 88 (3.3)                    | 97                  | 70 (2.6)                           | 74                  |
| Overnight hospitalization <sup>‡</sup> | 135 (5.1)                   | 143                 | 152 (5.7)                          | 164                 |
| Head injury                            | 31 (1.2)                    | 32                  | 39 (1.5)                           | 39                  |
| Sprain or strain                       | 1 (0.0)                     | 1                   | 2 (0.1)                            | 2                   |
| Bruising or swelling                   | 17 (0.6)                    | 19                  | 23 (0.9)                           | 28                  |
| Other serious injury                   | 4 (0.2)                     | 5                   | 3 (0.1)                            | 4                   |

Legend: \* Percentages are of all participants randomized to each study arm. Each row refers to the number of participants experiencing at least one injury of the shown type. Since each participant may

have experienced more than one type of injury across injury types, the sum total of participants experiencing each type of injury is greater than the number of participants with a serious fall injury.

† Each row refers to the number of events with at least one injury of the shown type. Since each event may have resulted in more than one type of injury across injury types, the sum total of events with each type of injury is greater than the number of serious fall injury events.

‡ Some hospitalizations included more than one type of injury.
